# Supplementary material
Source: PubMed Central journal article supplement (PMC6718168)
Supplement: nn8b07902_si_002.pdf [file nn8b07902_si_002.pdf]

Supporting Information For

**‘Intrinsic Antibacterial Activity of Nanoparticles Made of  $\beta$ -Cyclodextrins Potentiates Their Effect as Drug Nanocarriers against Tuberculosis’**

Arnaud Machelart<sup>1</sup>, Giuseppina Salzano<sup>2</sup>, Xue Li<sup>2</sup>, Aurore Demars<sup>3</sup>, Anne-Sophie Debie<sup>1</sup>, Mario Menendez-Miranda<sup>2</sup>, Elisabetta Pancani<sup>2</sup>, Samuel Jouny<sup>1</sup>, Eik Hoffmann<sup>1</sup>, Nathalie Deboosere<sup>1</sup>, Imène Belhaouane<sup>1</sup>, Carine Rouanet<sup>1</sup>, Sophie Simar<sup>4</sup>, Smaïl Talahari<sup>4</sup>, Valerie Giannini<sup>5</sup>, Baptiste Villemagne<sup>6</sup>, Marion Flipo<sup>6</sup>, Roland Brosch<sup>5</sup>, Fabrice Nessler<sup>4</sup>, Benoit Deprez<sup>6</sup>, Eric Muraille<sup>3,7</sup>, Camille Locht<sup>1</sup>, Alain R. Baulard<sup>1</sup>, Nicolas Willand<sup>6</sup>, Laleh Majlessi<sup>5,8</sup>, Ruxandra Gref<sup>2\*</sup>, Priscille Brodin<sup>1\*</sup>

<sup>1</sup>Univ. Lille, CNRS, INSERM, CHU Lille, Institut Pasteur de Lille, U1019 - UMR 8204 - CIIL - Center for Infection and Immunity of Lille, F-59000 Lille, France

<sup>2</sup>Univ. Paris Sud, Univ. Paris-Saclay, CNRS, UMR 8214 - Institute for Molecular Sciences of Orsay (ISMO), F-91405 Orsay, France

<sup>3</sup>Univ. Namur, Research Unit in Microorganisms Biology (URBM), Laboratory of immunology and microbiology, Narilis, B-5000 Namur, Belgium

<sup>4</sup>Univ. Lille, Institut Pasteur de Lille, EA 4483, F-59000 Lille, France

<sup>5</sup>Institut Pasteur, Unit for Integrated Mycobacterial Pathogenomics, Paris, CNRS UMR 3525, 25 rue du Dr. Roux, F-75015 Paris, France

<sup>6</sup>Univ. Lille, INSERM, Institut Pasteur de Lille, U1177 - Drugs and Molecules for living Systems, F-59000 Lille, France

<sup>7</sup>Univ. Libre de Bruxelles, Laboratory of Parasitology, Faculty of Medicine, B-1070 Brussels, Belgium

<sup>8</sup>Present address : Institut Pasteur, Theravectys Joint Lab, 28 rue du Dr. Roux, F-75015 Paris, France

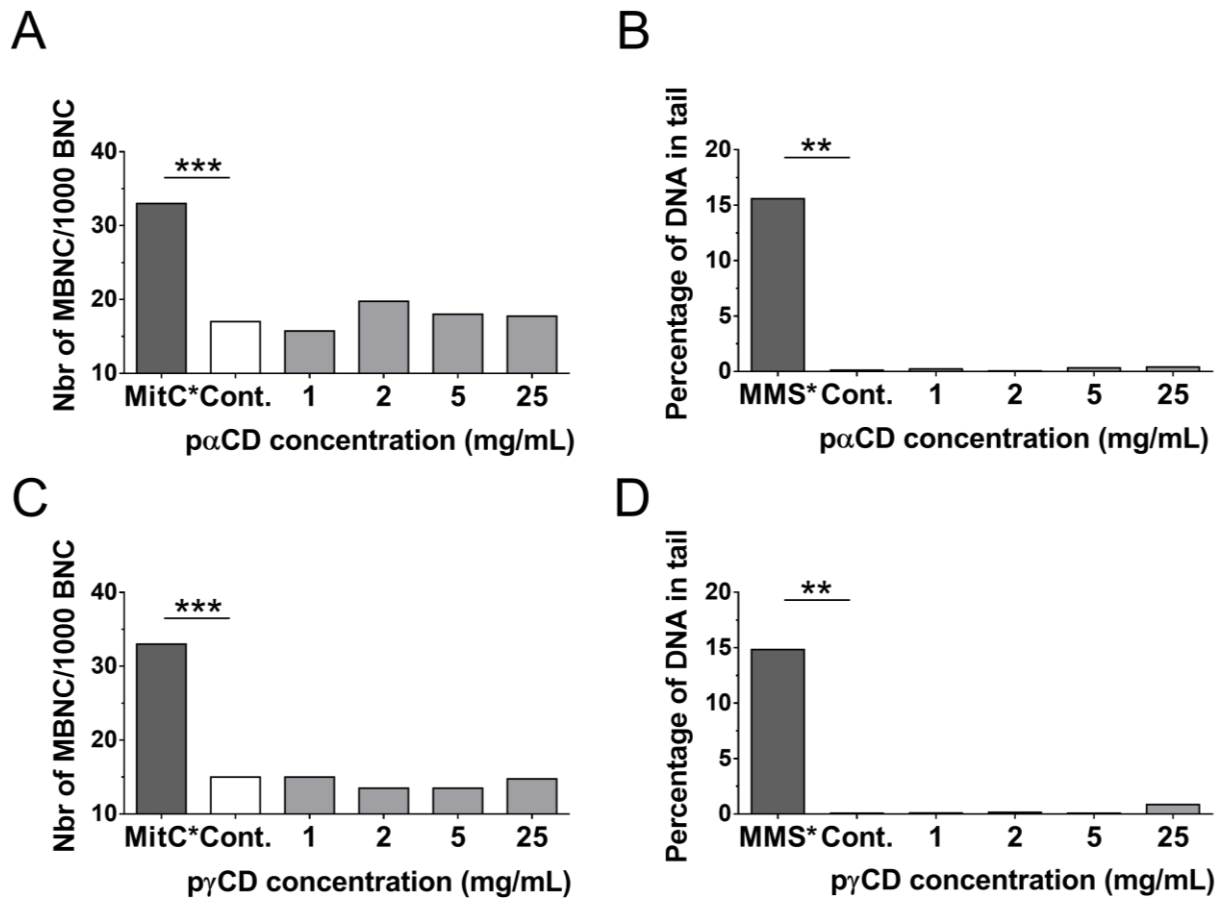

**supporting Figure 1. pαCD and pγCD are not genotoxic.** THP1 cells were incubated for 4 hours with different concentrations of pαCD and pγCD for evaluation of genotoxicity. The micronucleus assay was used to detect any damage that occurred during cell division (mitomycin was used as positive control) after incubation with pαCD (A) and pγCD (C), while the comet assay was used to evaluate DNA strand breaks (methylmethane sulfonate was used as positive control) after incubation with pαCD (B) and pγCD (D).

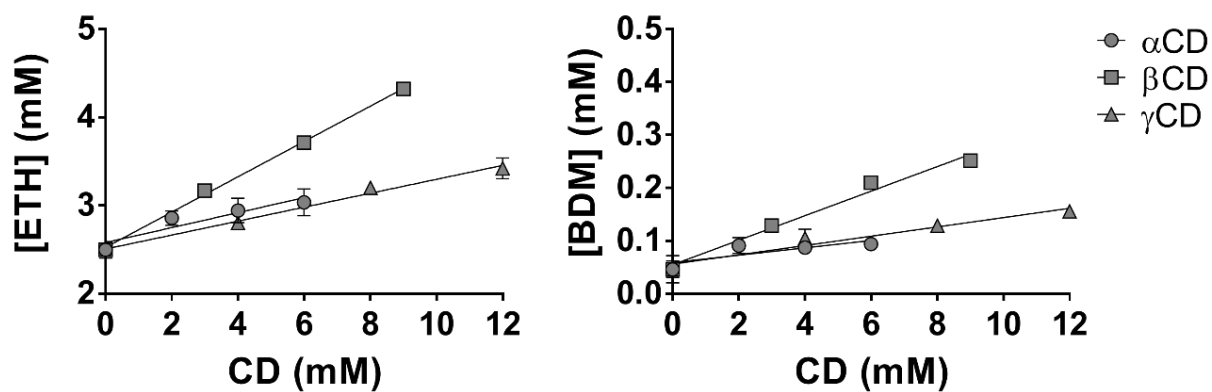

**supporting Figure 2.** Solubility properties of ETH and BDM43266 using  $\alpha$ CD,  $\beta$ CD and  $\gamma$ CD.

| <b>CDs</b>    | <b>K<sub>1:1</sub> (ETH, M<sup>-1</sup>)</b> | <b>K<sub>1:1</sub> (Booster, M<sup>-1</sup>)</b> |
|---------------|----------------------------------------------|--------------------------------------------------|
| $\alpha$ CD   | 24 ± 11                                      | 100 ± 13                                         |
| $\beta$ CD    | 100 ± 30                                     | 514 ± 21                                         |
| $\gamma$ CD   | 47 ± 10                                      | 256 ± 11                                         |
| p $\alpha$ CD | 39 ± 11                                      | 503 ± 33                                         |
| p $\beta$ CD  | 110 ± 21                                     | 1037 ± 35                                        |
| p $\gamma$ CD | 87 ± 12                                      | 449 ± 14                                         |

**supporting Table 1.** Binding constants K<sub>1:1</sub> obtained from the solubility curves for ETH and Booster, according to the results presented in Figure 7B.
